# Supplementary material
Source: Springer Nature journal article supplement (https://www.springermedizin.de/resource/supplementary/12950_2007_64_MOESM7_ESM.pdf/9557930)

# Figure 5 (Choice 1a)

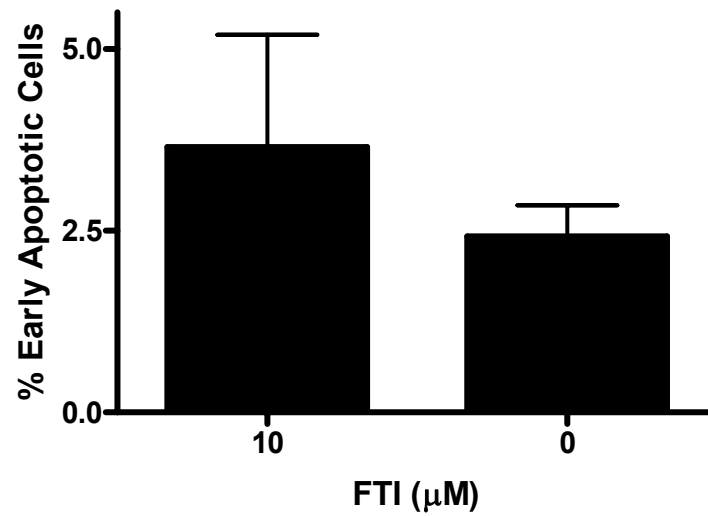

Supplement: MOESM7 [file 9557930]
